# Supplementary material for: GBA1 status and sex impact on depression severity and progression in Parkinson’s Disease
Source: Research Square preprint supplement (doi:10.21203/rs.3.rs-7929738/v1), 2025-11-06
Supplement: Supplementary file 1 [file 7f8589d518b1021eb6ca90d0.docx]

# **SUPPLEMENTARY TABLES**

# **Supplementary table 1.** Cross-sectionalprevalence, predictors, and sex differences in depression

|  | GBA-PD (N = 78) | nonGBA-PD (N = 156) |
| --- | --- | --- |
| BDI ≥ 14 (n, %) | 26 (33.3%) | 20 (12.9%) |
| OR for BDI ≥ 14 | 3.37 [1.67–6.80], p < 0.001 | |
| Model fit | R² = 0.251; adj. R² = 0.173, overall model p = 0.06 | R² 0.300; adj. R² = 0.231,  overall model p < 0.001 |
| Significant predictors (β, 95% CI, p) | RBDSQ: 0.6 [0.08–1.09], p = 0.02) | UPDRS-IV: 0.32 [0.04–0.60], p = 0.02  MoCA: –0.40 [–0.79 to –0.01], p = 0.04  Sex (M): –2.55 [–5.01 to –0.08], p = 0.03 |

**Prevalence of clinically significant depression (BDI-II ≥14) and predictors of cross-sectional depressive symptoms**. Multivariate linear regression models were fitted separately for GBA-PD and nonGBA-PD groups to identify baseline predictors of BDI-II scores. Odds ratios (OR) are reported with 95% confidence intervals in square brackets. Regression coefficients (β) are shown with corresponding 95% confidence intervals in square brackets and p-values. Sex was coded as 0 = female, 1 = male. p-values (FDR-adjusted)

# **Supplementary Table 2** - Baseline demographic and clinical characteristics of the longitudinal GBA-PD and nonGBA-PD subgroups

|  | GBA-PD  n. 57 | nonGBA-PD  n. 83 | p-value |
| --- | --- | --- | --- |
| N of males (%) | 30 (52.6%) | 54 (65%) | 0.1 |
| Age (years) | 58.99±9.41 | 66.81±8.38 | **<0.001** |
| Years of Education | 12.13±4.17 | 11.14±4.34 | 0.2 |
| Age at Onset (years) | 50.66±10.49 | 59.34±9.32 | **<0.001** |
| Disease Duration (years) | 8.3±5.65 | 7.45±5.32 | 0.4 |
| LEDD (mg/day) | 808.27±544.76 | 714.19±416.92 | 0.3 |
| MDS-UPDRS I | 11.49±5.84 | 8.91±5.59 | **0.01** |
| MDS-UPDRS II | 11.31±5.95 | 9.93±6.73 | 0.2 |
| MDS-UPDRS III | 24.12±14.59 | 26.19±13.38 | 0.4 |
| MDS-UPDRS IV | 3.71±3.82 | 2.8±3.66 | 0.2 |
| SCOPA-AUT | 15.29±8.41 | 15.53±7.9 | 0.9 |
| RBDSQ | 5.41±3.26 | 4.81±2.89 | 0.3 |
| - N (%)of subcjects with ≥5 score | 26 (45%) | 34 (41%) | 0.7 |
| - N (%) of subjects with <5 score | 31 (55%) | 49 (59%) | 0.7 |
| UPSIT | 18.31±5.28 | 17.16±6.13 | 0.3 |
| MoCA | 23.6±4.7 | 23.4±3.8 | 0.8 |
| BDI-II | 11.17±6.23 | 8.23±6.07 | **0.008** |
| Antidepressant Treatment (%yes) | 14 (26.4%) | 23 (27.7%) | 0.9 |
| Antipsychotic Treatment (%yes) | 4 (7.5%) | 5 (6%) | 0.7 |
| Anxiolytic Treatment (%yes) | 15 (28.3%) | 18 (21.7%) | 0.4 |
| GBA variants distribution |  |  |  |
| Mild | 9 (16.9%) | - | - |
| Risk | 15 (28.3%) | - | - |
| Severe | 20 (37.7%) | - | - |
| Unknown | 9 (16.9%) | - | - |

Abbreviations: F: Females; M: Males; LEDD: Levodopa Equivalent Daily Dose; MDS-UPDRS: Movement Disorder Society Unified Parkinson's Disease Rating Scale scores across its four components (Parts I to IV); MoCA: Montreal Cognitive Assessment; SCOPA-AUT: Scales for Outcomes in Parkinson's Disease – Autonomic; UPSIT: University of Pennsylvania Smell Identification Test; RBDSQ: Rapid Eye Movement Sleep Behavior Disorder Screening Questionnaire; BDI-II: Beck Depression Inventory. All p-values shown are FDR-adjusted.
